# Supplementary material for: Expression profile of Epstein-Barr virus and human adenovirus small RNAs in tonsillar B and T lymphocytes
Source: PubMed Central journal article supplement (PMC5444648; doi:10.1371/journal.pone.0177275), 2017-05-25
Supplement: pone.0177275.s001.pdf [file pone.0177275.s001.pdf]

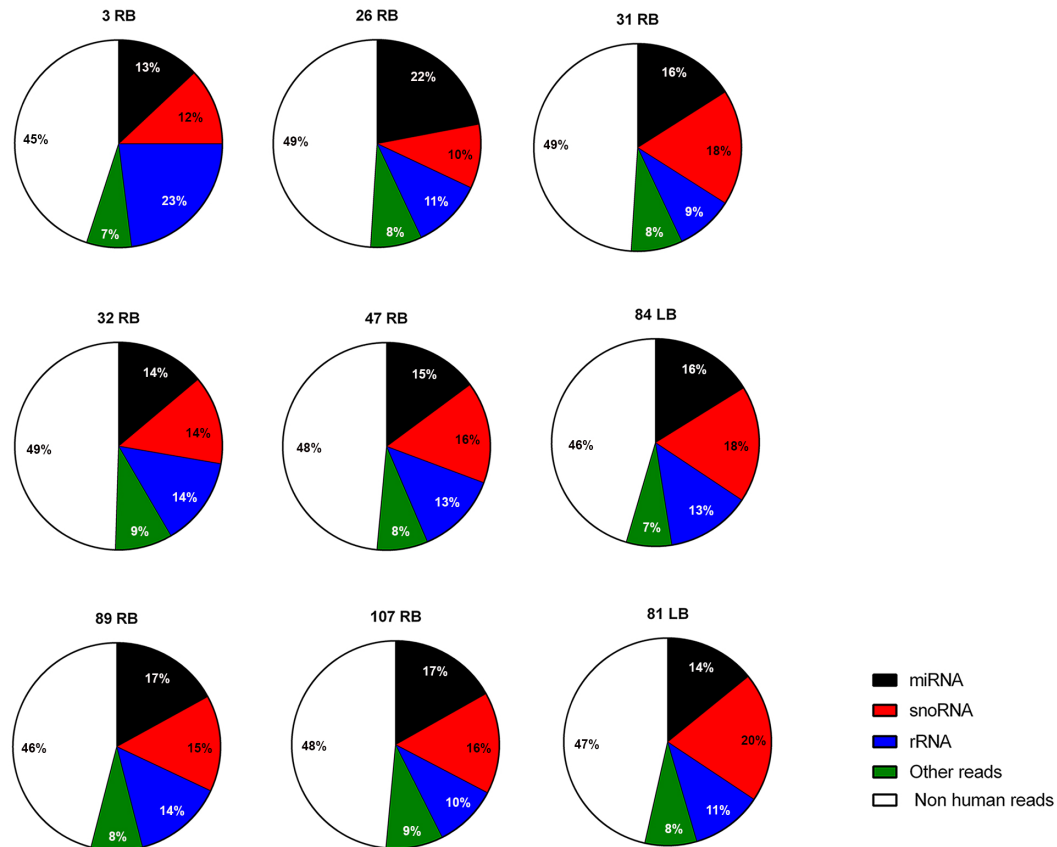

**Figure S1A.** Genotyping of the EBV+ sequencing reads aligned to human genome. The pie charts display the distribution of mapped reads from EBV+ patient samples.

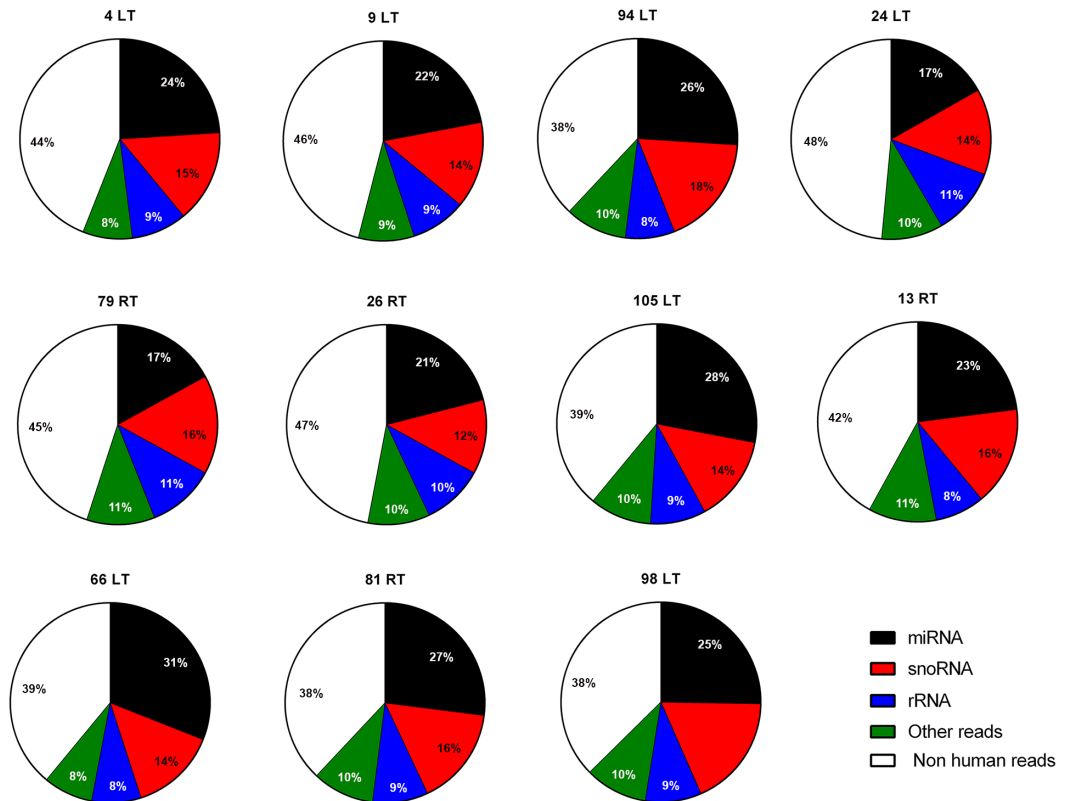

**Figure S1B.** Genotyping of the HAdV sequencing reads aligned to human genome. The pie charts display the distribution of the mapped reads from HAdV+ patient samples.
