# Supplementary material for: Expression profile of Epstein-Barr virus and human adenovirus small RNAs in tonsillar B and T lymphocytes
Source: PubMed Central journal article supplement (PMC5444648; doi:10.1371/journal.pone.0177275), 2017-05-25
Supplement: pone.0177275.s002.pdf [file pone.0177275.s002.pdf]

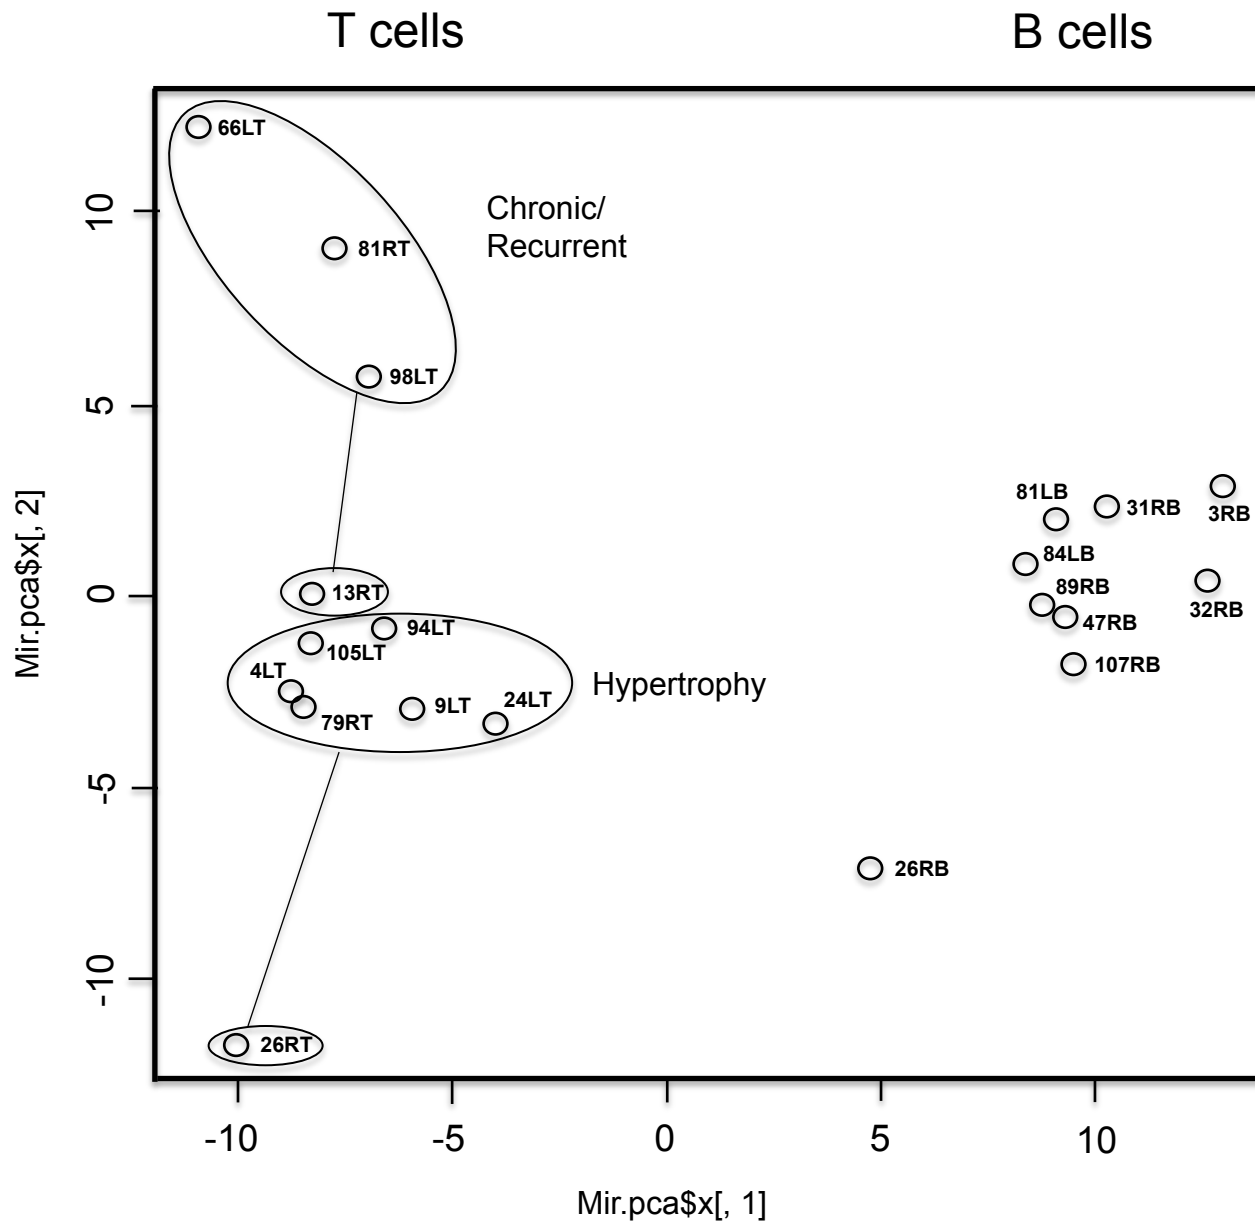

**Figure S2. Principle component analysis (PCA) of cellular miRNA expression in the tonsillar B and T lymphocytes.** The PCA analysis was performed on the data set normalized based on the TMM method. For the T cell patient samples the Diagnosis (tonsillar hypertrophy versus chronic/recurrent tonsillitis) are shown circled.
