# Supplementary material for: Expression profile of Epstein-Barr virus and human adenovirus small RNAs in tonsillar B and T lymphocytes
Source: PubMed Central journal article supplement (PMC5444648; doi:10.1371/journal.pone.0177275), 2017-05-25
Supplement: pone.0177275.s003.pdf [file pone.0177275.s003.pdf]

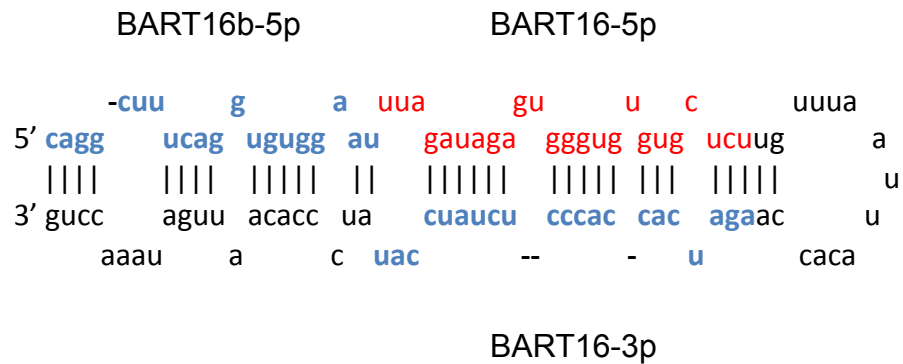

**Figure S3. The proposed EBV miR-BART16 precursor RNA.** The annotated BART16-5p miRNA is shown in red whereas the new BART16-3p and BART16b-5p are shown in blue.
