# Supplementary material for: Expression profile of Epstein-Barr virus and human adenovirus small RNAs in tonsillar B and T lymphocytes
Source: PubMed Central journal article supplement (PMC5444648; doi:10.1371/journal.pone.0177275), 2017-05-25
Supplement: pone.0177275.s004.pdf [file pone.0177275.s004.pdf]

**3 RB**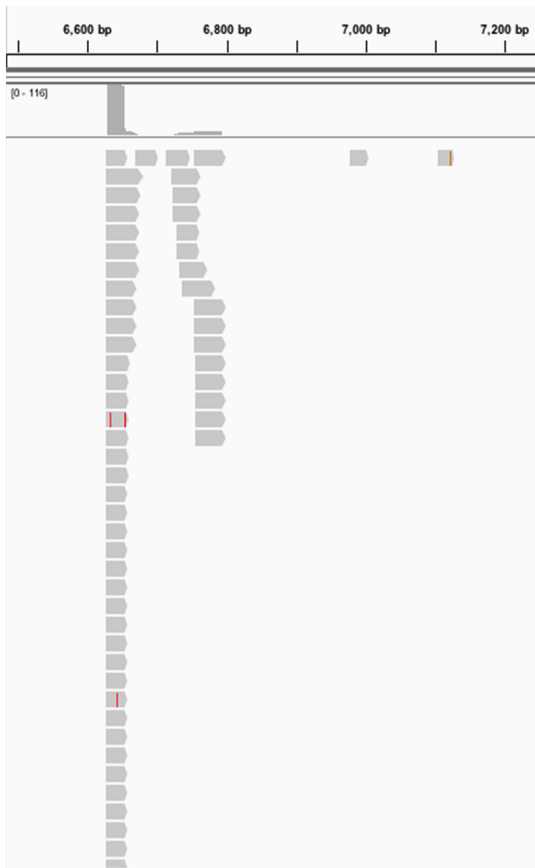**26 RB**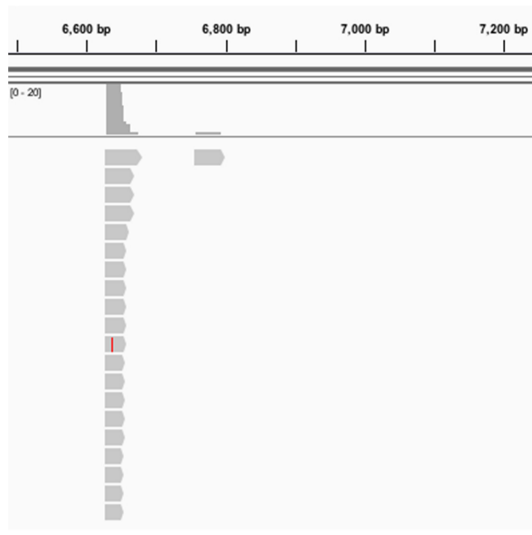**31 RB**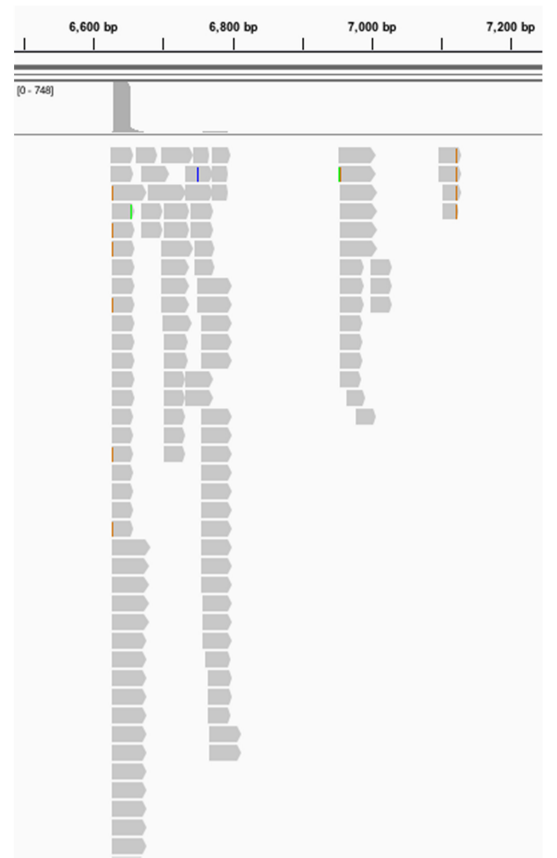**32 RB**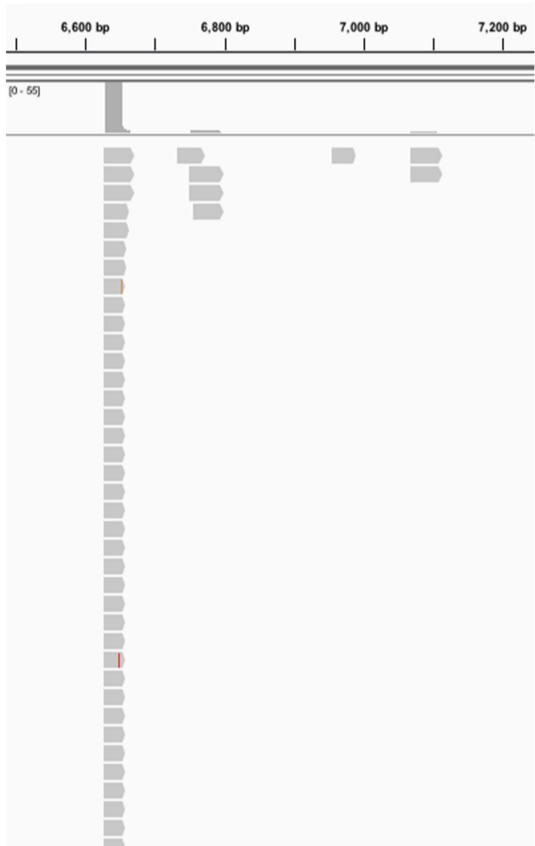**47 RB**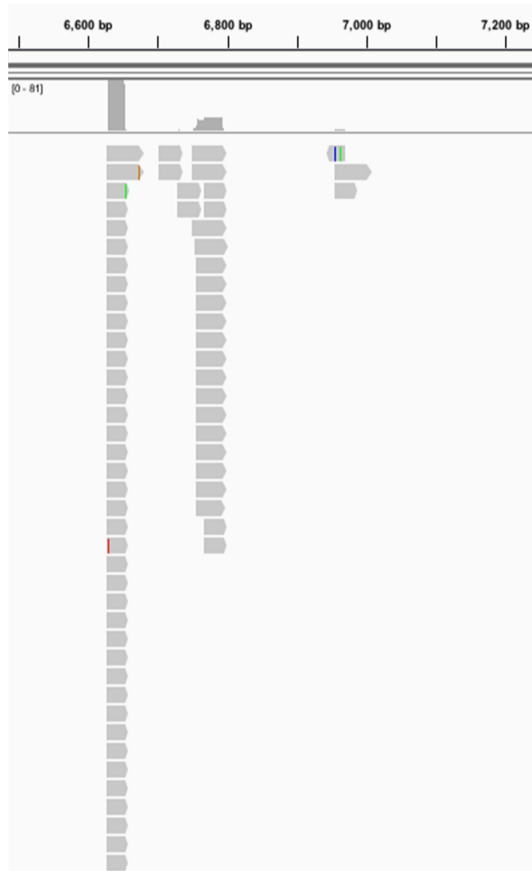**84 LB**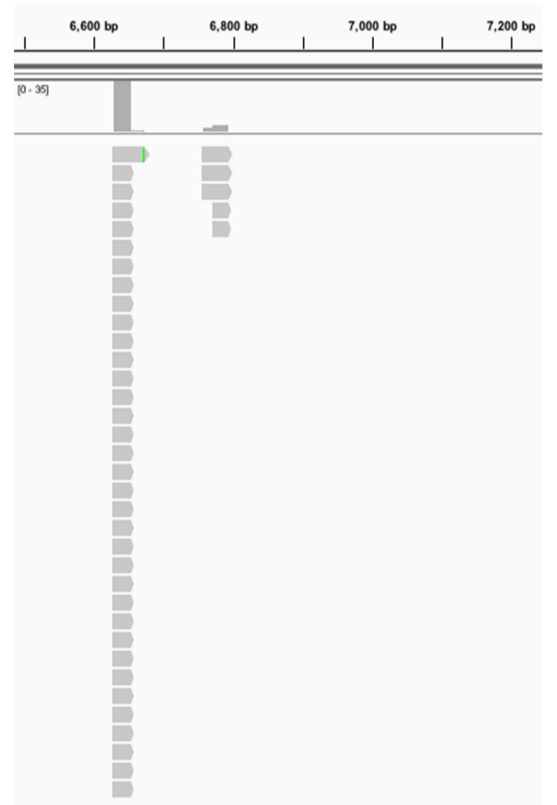**89 RB**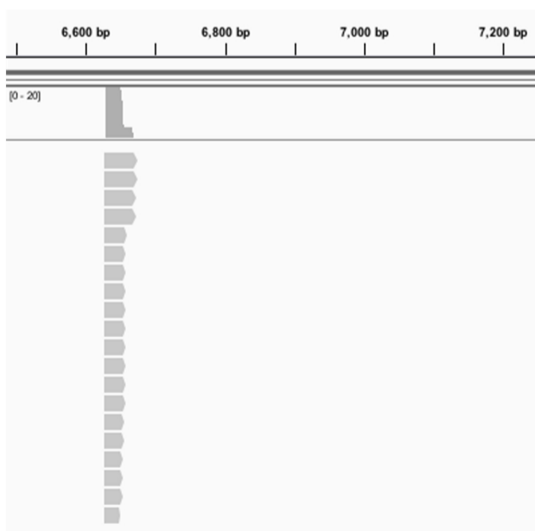**107 RB**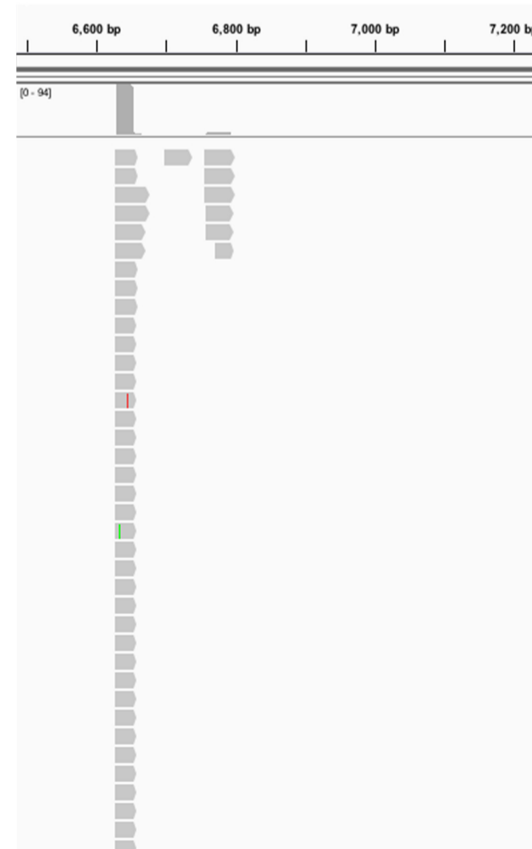**81 LB**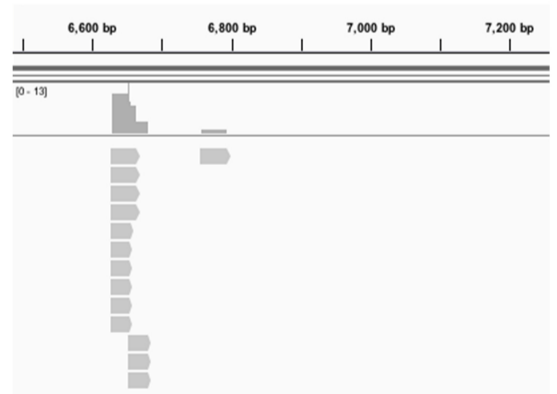

**Figure S4. Coverage of EBER derived small RNA reads in the EBV+ B lymphocytes from the different patients. The boxes indicate the relative distribution of reads mapped to 5' or 3' regions of EBER1 and EBER2.**
