# Supplementary material for: Expression profile of Epstein-Barr virus and human adenovirus small RNAs in tonsillar B and T lymphocytes
Source: PubMed Central journal article supplement (PMC5444648; doi:10.1371/journal.pone.0177275), 2017-05-25
Supplement: pone.0177275.s005.pdf [file pone.0177275.s005.pdf]

| EBV miRNA          | Start  | End    | % of relative expression of EBV miRNAs in the individual samples |              |              |              |              |              |              |              |              |
|--------------------|--------|--------|------------------------------------------------------------------|--------------|--------------|--------------|--------------|--------------|--------------|--------------|--------------|
|                    |        |        | 3RB                                                              | 26RB         | 31RB         | 32RB         | 47RB         | 84LB         | 89RB         | 107 RB       | 81 LB        |
| <b>BHRF1-1-5p</b>  | 41474  | 41495  |                                                                  | 0.26         | 0.01         |              |              |              |              |              |              |
| <b>BHRF1-1-3p*</b> | 41512  | 41534  |                                                                  |              | 0.01         |              |              |              |              |              |              |
| <b>BHRF1-2-5p</b>  | 42853  | 42874  |                                                                  |              |              |              |              |              |              |              |              |
| <b>BHRF1-2-3p</b>  | 42888  | 42909  |                                                                  |              |              |              |              |              |              |              |              |
| <b>BHRF1-3</b>     | 42968  | 42989  |                                                                  |              |              |              |              |              |              |              |              |
| <b>BART3-5p</b>    | 139087 | 139107 | 0.03                                                             | 0.13         | 0.10         | 0.08         |              |              |              | 0.36         |              |
| <b>BART3-3p</b>    | 139124 | 139145 | 0.18                                                             | 0.39         | 0.21         |              | 0.25         | 0.42         | 0.46         |              |              |
| <b>BART4-5p</b>    | 139228 | 139249 | 0.37                                                             | 0.26         | 0.47         |              | 0.25         | 0.84         | 0.23         | 0.72         |              |
| <b>BART4-3p</b>    | 139266 | 139288 |                                                                  | 0.13         |              | 0.08         |              |              |              |              |              |
| <b>BART1-5p</b>    | 139351 | 139374 | 1.34                                                             | 1.57         | 1.02         | 1.28         | 0.76         | 2.95         | 0.93         | 0.97         | 0.41         |
| <b>BART1-3p</b>    | 139387 | 139408 | 0.42                                                             | 1.57         | 0.43         | 0.48         | 0.38         |              | 0.46         | 0.72         |              |
| <b>BART15-5p*</b>  | 139519 | 139542 |                                                                  | 0.39         | 0.07         | 0.24         |              | 1.27         |              |              |              |
| <b>BART15-3p</b>   | 139553 | 139574 | 0.03                                                             |              | 0.03         | 0.00         |              |              | 0.46         |              | 0.41         |
| <b>BART5-5p</b>    | 139675 | 139698 | 0.39                                                             | 0.65         | 0.37         | 0.16         | 0.25         | 0.42         |              | 0.30         | 0.41         |
| <b>BART5-3p</b>    | 139717 | 139734 | 0.00                                                             |              | 0.01         |              |              |              |              |              |              |
| <b>BART16b-5p*</b> | 139775 | 139794 | 0.16                                                             |              | 0.00         |              |              |              |              |              |              |
| <b>BART16-5p</b>   | 139795 | 139818 | 1.89                                                             | 1.31         | 1.96         | 1.20         | 2.40         | 4.22         | 0.93         | 2.17         | 0.41         |
| <b>BART16-3p*</b>  | 139834 | 139850 | 0.03                                                             |              | 0.01         |              |              |              |              |              |              |
| <b>BART17-5p</b>   | 139915 | 139936 | <b>18.45</b>                                                     | <b>11.10</b> | <b>17.49</b> | <b>15.17</b> | <b>10.61</b> | <b>8.86</b>  | <b>13.46</b> | <b>15.28</b> | <b>13.93</b> |
| <b>BART17-3p</b>   | 139953 | 139975 | 0.71                                                             | 0.91         | 0.76         | 0.24         | 0.51         |              | 1.39         | 0.97         | 0.41         |
| <b>BART6-5p</b>    | 140033 | 140054 | 0.45                                                             | 0.26         | 0.35         | 0.24         | 0.51         |              | 0.46         | 0.42         | 0.41         |
| <b>BART6-3p</b>    | 140072 | 140093 | <b>22.45</b>                                                     | <b>21.02</b> | <b>26.59</b> | <b>27.93</b> | <b>30.68</b> | <b>18.14</b> | <b>25.06</b> | <b>28.32</b> | <b>31.97</b> |
| <b>BART21-5p</b>   | 145514 | 145534 |                                                                  |              | 0.01         |              |              |              |              |              |              |
| <b>BART21-3p</b>   | 145548 | 145569 | 0.05                                                             |              | 0.02         |              | 0.13         | 0.42         |              |              |              |
| <b>BART18-5p</b>   | 145962 | 145983 | 0.05                                                             | 0.13         | 0.06         | 0.24         | 0.13         |              |              | 0.12         |              |

|                   |        |        |              |              |              |              |             |              |              |              |              |  |
|-------------------|--------|--------|--------------|--------------|--------------|--------------|-------------|--------------|--------------|--------------|--------------|--|
| <b>BART18-3p</b>  | 145998 | 146019 | 0.11         | 0.39         | 0.30         | 0.48         |             | 0.42         | 0.23         | 0.42         |              |  |
| <b>BART7-5p</b>   | 146439 | 146460 | <b>3.58</b>  | <b>4.18</b>  | <b>3.17</b>  | <b>2.65</b>  | <b>1.77</b> | <b>5.91</b>  | <b>4.41</b>  | <b>2.60</b>  | <b>4.51</b>  |  |
| <b>BART7-3p</b>   | 146475 | 146496 | 1.66         | 1.04         | 1.03         | 1.36         | 3.54        | 2.95         | 1.86         | 1.09         | 0.41         |  |
| <b>BART8-5p</b>   | 146772 | 146793 | <b>4.97</b>  | <b>5.35</b>  | <b>3.39</b>  | <b>6.66</b>  | <b>5.30</b> | <b>7.59</b>  | <b>8.58</b>  | <b>3.74</b>  | <b>6.56</b>  |  |
| <b>BART8-3p</b>   | 146807 | 146829 | 2.47         | 2.61         | 1.94         | 2.17         | 3.91        | 4.64         | 3.71         | 3.74         | 2.87         |  |
| <b>BART9-5p</b>   | 146959 | 146980 | 0.89         | 2.09         | 0.61         | 0.32         | 1.39        | 1.69         | 0.46         | 0.36         | 3.28         |  |
| <b>BART9-3p</b>   | 146997 | 147019 | 0.58         | 0.13         | 0.68         | 0.40         | 0.13        | 0.84         | 0.23         | 1.15         |              |  |
| <b>BART22-5p*</b> | 147169 | 147190 | 0.18         |              | 0.15         |              | 0.25        |              |              |              |              |  |
| <b>BART22-3p</b>  | 147203 | 147225 | 3.26         | 4.83         | 2.33         | 2.81         | 1.52        | 2.11         | 4.64         | 2.66         | 3.28         |  |
| <b>BART10-5p</b>  | 147321 | 147342 |              | 0.13         | 0.03         |              |             |              |              |              |              |  |
| <b>BART10-3p</b>  | 147356 | 147378 | 1.71         | 1.83         | 1.28         | 1.04         | 3.16        | 2.95         | 2.09         | 1.93         | 1.64         |  |
| <b>BART11-5p</b>  | 147537 | 147560 | 1.37         | 2.48         | 1.15         | 1.20         | 2.78        | 3.80         | 0.23         | 0.72         | 1.23         |  |
| <b>BART11-3p</b>  | 147575 | 147595 | <b>5.15</b>  | <b>6.79</b>  | <b>7.50</b>  | <b>8.27</b>  | <b>7.45</b> | <b>10.97</b> | <b>6.96</b>  | <b>7.55</b>  | <b>10.25</b> |  |
| <b>BART12-5p*</b> | 147900 | 147922 | 0.24         | 0.52         | 0.44         | 0.40         | 0.38        |              | 0.46         | 0.12         | 0.41         |  |
| <b>BART12-3p</b>  | 147936 | 147957 | 0.63         | 0.26         | 0.63         | 1.04         | 0.38        | 2.95         | 0.46         | 0.42         | 0.41         |  |
| <b>BART19-5p</b>  | 148215 | 148237 | <b>12.59</b> | <b>10.57</b> | <b>10.72</b> | <b>10.59</b> | <b>8.33</b> |              | <b>10.67</b> | <b>7.13</b>  | <b>7.79</b>  |  |
| <b>BART19-3p</b>  | 148254 | 148274 | 0.79         | 1.04         | 0.47         | 0.80         | 0.63        | 0.42         | 0.93         | 0.79         | 0.41         |  |
| <b>BART20-5p</b>  | 148339 | 148359 | 0.08         |              |              |              |             |              |              |              |              |  |
| <b>BART20-3p</b>  | 148374 | 148395 |              |              |              |              |             |              |              |              |              |  |
| <b>BART13-5p</b>  | 148526 | 148547 | <b>5.68</b>  | <b>6.66</b>  | <b>8.87</b>  | <b>5.86</b>  | <b>6.57</b> | <b>11.81</b> | <b>5.80</b>  | <b>10.81</b> | <b>4.51</b>  |  |
| <b>BART13-3p</b>  | 148563 | 148585 |              | 0.39         | 0.05         | 0.16         |             |              | 0.93         | 0.06         |              |  |
| <b>BART14-5p</b>  | 148744 | 148765 | 0.29         | 0.26         | 0.22         | 0.08         |             |              |              | 0.18         |              |  |
| <b>BART14-3p</b>  | 148778 | 148799 | 4.02         | 4.05         | 2.59         | 4.09         | 3.41        | 1.27         | 2.78         | 2.66         | 1.23         |  |
| <b>BART2-5p</b>   | 152747 | 152768 | 2.58         | 3.92         | 2.35         | 2.01         | 2.15        | 2.11         | 0.70         | 1.39         | 2.46         |  |
| <b>BART2-3p</b>   | 152783 | 152806 | 0.18         | 0.39         | 0.13         | 0.24         | 0.13        |              |              | 0.12         | 0.41         |  |

**Table S1: The expression level of the miRNAs in the individual patient samples** is shown as the percentage of each miRNA relative to the total miRNA content. The asterisk denotes new miRNAs not annotated in miRBase v21. The highest-expressed miRNAs in each sample are shown in bold.
