# Supplementary material for: Expression profile of Epstein-Barr virus and human adenovirus small RNAs in tonsillar B and T lymphocytes
Source: PubMed Central journal article supplement (PMC5444648; doi:10.1371/journal.pone.0177275), 2017-05-25
Supplement: pone.0177275.s006.pdf [file pone.0177275.s006.pdf]

| EBV                                 | Samples |      |      |      |      |      |      |       |      |
|-------------------------------------|---------|------|------|------|------|------|------|-------|------|
|                                     | 3RB     | 26RB | 31RB | 32RB | 47RB | 84LB | 89RB | 107RB | 81LB |
| <b>EBER1-derived small RNAs</b>     | 3.4     | 2.6  | 4.5  | 4.4  | 11.6 | 13.1 | 5.2  | 5.5   | 3.8  |
| <b>EBER2-derived small RNAs</b>     | 0.0     | 0.0  | 0.1  | 0.1  | 0.2  | 0.0  | 0.0  | 0.0   | 0.0  |
| <b>miR-BART17-5p</b>                | 17.4    | 10.4 | 16.2 | 14.3 | 9.3  | 7.1  | 12.4 | 14.3  | 11.7 |
| <b>miR-BART6-3p</b>                 | 21.2    | 19.8 | 24.7 | 26.4 | 27.0 | 14.5 | 23.2 | 26.5  | 26.9 |
| <b>v-snoRNA1-derived small RNAs</b> | 2.2     | 3.4  | 2.6  | 1.1  | 0.2  | 7.1  | 2.4  | 1.0   | 12.1 |

**Table S2. Expression level of the EBER- and v-snoRNA1-derived small RNAs and the highest expressed BART miRNAs in the EBV-infected B lymphocyte patient samples.** The expression level of the small RNAs/miRNAs in individual patients is shown as the percentage that each RNA contributes to the total EBV-specific small RNA pool.
